# Supplementary material
Source: publisher site journal article supplement (https://www.spandidos-publications.com/587/downloadSupplementary)

Figure S1. Ultrasound images of the fetal kidney of the current pregnancy (III:2) at weeks 22-26. (A) A cross-section of the abdomen of the fetus revealed that the volume of both kidneys was larger than a normal fetus at the same gestational week. The parenchymal echo was enhanced and the boundary of the cortex and medulla was not clear. (B) On the coronal section of the abdomen of the fetus, color doppler flow imaging demonstrated that the blood flow to the kidney was normal. LK, left kidney; RK, right kidney.

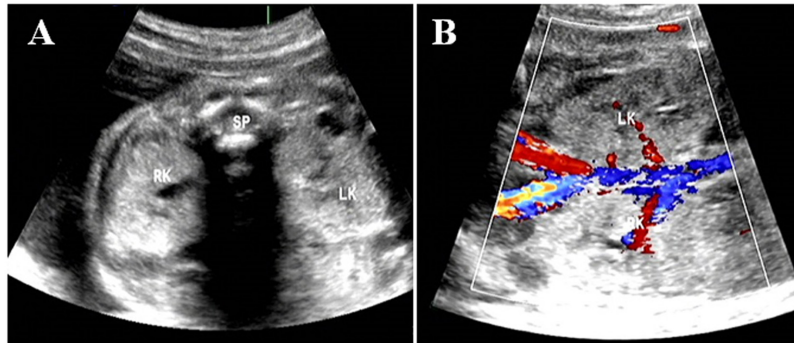

Supplement: Supplementary file 1 [file downloadSupplementary]
